# Supplementary material for: Comparative Genome Analyses of Wild Type- and Quinolone Resistant Escherichia coli Indicate Dissemination of QREC in the Norwegian Broiler Breeding Pyramid
Source: Front Microbiol. 2020 May 19;11:938. doi: 10.3389/fmicb.2020.00938 (PMC7248565; doi:10.3389/fmicb.2020.00938)
Supplement: Supplementary file 1 [file Data_Sheet_1.XLSX]

## Sheet: Ark1
ID	Method	Year	Location	QREC	TET	CHL	AMP	CTX	SMX	TMP	GEN	NAL	CIP	ST	GyrA	GyrB	ParC	ParE	aadA1	aadA5	aph3Ib	aph6Id	blaCMY2	blaTEM1A	blaTEM1B	blaTEM220	catA1	dfrA1	dfrA14	dfrA17	dfrA5	fosA7	sul1	sul2	sul3	tetA	tetB
10-12-S-1_S17	S	2014	L	1	2	8	4	0.25	8	0.25	0.5	256	0.25	355	S83L	0	0	D475E	0	0	0	0	0	0	0	0	0	0	0	0	0	0	0	0	0	0	0
11-13-S-1_S18	S	2014	T	1	2	8	4	0.25	8	0.25	0.5	256	0.25	355	S83L	0	0	D475E	0	0	0	0	0	0	0	0	0	0	0	0	0	0	0	0	0	0	0
115-2016-01-3474_S56	T	2016	D	1	2	8	4	0.25	2048	1	1	64	0.25	641	S83L	0	0	0	0	0	0	0	0	0	0	0	0	0	0	0	0	0	0	0	0	0	0
116-2016-01-3763_S68	T	2016	K	1	2	8	2	0.25	8	0.25	0.5	256	1	752	S83L	0	S80I	0	0	0	1	1	0	0	0	0	0	0	0	0	0	0	0	0	0	0	0
1-1-S-1_S8	S	2014	N	1	2	8	4	0.25	16	0.25	1	64	0.25	349	S83L	0	0	0	0	0	0	0	0	0	0	0	0	0	0	0	0	0	0	0	0	0	0
1-2014-01-2145_S126	S	2014	C	1	2	8	128	0.25	2048	64	1	128	0.25	162	S83L	0	0	0	0	0	1	1	0	0	1	0	0	0	0	0	1	0	0	1	0	0	0
12-14-S-1_S19	S	2014	O	1	2	8	4	0.25	8	0.25	1	64	0.25	349	S83L	0	0	0	0	0	0	0	0	0	0	0	0	0	0	0	0	0	0	0	0	0	0
13-15-S-1_S20	S	2014	K	1	2	8	2	0.25	32	1	0.5	128	0.25	355	S83L	0	0	D475E	0	0	0	0	0	0	0	0	0	0	0	0	0	0	0	0	0	0	0
14-16-S-1_S21	S	2014	H	1	2	8	2	0.25	32	0.5	0.5	128	0.25	355	S83L	0	0	D475E	0	0	0	0	0	0	0	0	0	0	0	0	0	0	0	0	0	0	0
15-17-S-1_S22	S	2014	D	1	2	8	4	0.25	16	0.5	0.5	128	0.25	355	S83L	0	0	D475E	0	0	0	0	0	0	0	0	0	0	0	0	0	0	0	0	0	0	0
16-18-S-1_S23	S	2014	F	1	2	8	2	0.25	16	0.5	0.5	128	0.25	117	S83L	0	0	0	0	0	0	0	0	0	0	0	0	0	0	0	0	0	0	0	0	0	0
17-20-S-1_S24	S	2014	E	1	2	8	2	0.25	16	0.25	0.5	128	0.25	155	S83L	0	0	0	0	0	0	0	0	0	0	0	0	0	0	0	0	0	0	0	0	0	0
18-22-S-1_S25	S	2014	M	1	2	8	4	0.25	16	0.25	0.5	64	0.25	349	S83L	0	0	0	0	0	0	0	0	0	0	0	0	0	0	0	0	0	0	0	0	0	0
19-23-S-1_S26	S	2014	K	1	2	8	4	0.25	16	0.25	0.5	64	0.25	349	S83L	0	0	0	0	0	0	0	0	0	0	0	0	0	0	0	0	0	0	0	0	0	0
196-2014-01-6041_TAAGGCGA-TTATGCGA	S	2014	B	1	2	8	4	0.25	16	0.25	1	32	0.25	349	S83L	0	0	0	0	0	0	0	0	0	0	0	0	0	0	0	0	0	0	0	0	0	0
20-24-S-1_S27	S	2014	T	1	2	8	4	0.25	8	0.25	0.5	128	0.25	602	S83L	0	0	0	0	0	0	0	0	0	0	0	0	0	0	0	0	0	0	0	0	0	0
21-25-S-1_S28	S	2014	D	1	2	8	2	0.25	8	0.25	0.5	256	0.25	4994	S83L	0	0	L488M, A512T	0	0	0	0	0	0	0	0	0	0	0	0	0	0	0	0	0	0	0
218-2014-01-7490_TCCTGAGC-AAGGCTAT	S	2014	R	1	2	8	1	0.25	8	0.25	2	128	0.12	10	S83L	0	0	0	0	0	0	0	0	0	0	0	0	0	0	0	0	0	0	0	0	0	0
22-26-S-1_S29	S	2014	O	1	2	8	4	0.25	8	0.25	0.5	64	0.25	349	S83L	0	0	0	0	0	0	0	0	0	0	0	0	0	0	0	0	0	0	0	0	0	0
224-2014-01-860_GGACTCCT-GCGTAAGA	S	2014	V	1	2	8	4	0.25	2048	1	1	64	0.25	115	S83L	0	0	0	0	0	0	0	0	0	0	0	0	0	0	0	0	0	0	1	0	0	0
2-2-S-1_S9	S	2014	J	1	2	8	2	0.25	8	0.25	0.5	32	0.25	349	S83L	0	0	0	0	0	0	0	0	0	0	0	0	0	0	0	0	0	0	0	0	0	0
23-28-S-1_S30	S	2014	P	1	2	8	4	0.25	8	0.25	0.5	128	0.25	355	S83L	0	0	D475E	0	0	0	0	0	0	0	0	0	0	0	0	0	0	0	0	0	0	0
24-29-S-1_S31	S	2014	S	1	2	8	4	0.25	32	0.5	0.5	128	0.25	355	S83L	0	0	D475E	0	0	0	0	0	0	0	0	0	0	0	0	0	0	0	0	0	0	0
25-31-S-1_S32	S	2014	U	1	2	8	4	0.25	16	0.25	1	256	0.25	191	S83L	0	0	0	0	0	0	0	0	0	0	0	0	0	0	0	0	0	0	0	0	0	0
26-35-S-1_S33	S	2017	L	1	2	8	4	0.25	8	0.25	0.5	128	0.25	355	S83L	0	0	D475E	0	0	0	0	0	0	0	0	0	0	0	0	0	0	0	0	0	0	0
27-36-S-1_S34	S	2017	L	1	4	8	4	0.25	16	0.25	2	256	0.5	131	S83L	0	0	0	0	0	0	0	0	0	0	0	0	0	0	0	0	0	0	0	0	0	0
28-37-S-1_S35	S	2017	L	1	2	8	4	0.25	8	0.25	0.5	128	0.25	355	S83L	0	0	D475E	0	0	0	0	0	0	0	0	0	0	0	0	0	0	0	0	0	0	0
29-38-T-0_S36	T	2006	E	0	2	8	1	0.06	16	0.5	1	4	0.03	1286	0	0	0	0	0	0	0	0	0	0	0	0	0	0	0	0	0	0	0	0	0	0	0
30-39-T-0_S37	T	2006	H	0	2	4	2	0.06	16	0.5	2	2	0.03	10	0	0	0	0	0	0	0	0	0	0	0	0	0	0	0	0	0	0	0	0	0	0	0
31-40-T-0_S38	T	2006	K	0	2	4	2	0.06	16	0.5	1	4	0.03	4537	0	0	0	0	0	0	0	0	0	0	0	0	0	0	0	0	0	0	0	0	0	0	0
32-41-T-0_S39	T	2006	C	0	2	4	4	0.06	16	1	1	4	0.06	355	0	0	0	D475E	0	0	0	0	0	0	0	0	0	0	0	0	0	0	0	0	0	0	0
33-42-T-0_S40	T	2006	U	0	2	4	2	0.06	4096	64	0.5	2	0.03	6726	0	0	0	0	0	0	0	0	0	0	0	0	0	0	1	0	0	0	0	1	0	0	0
3-3-S-1_S10	S	2014	R	1	2	8	4	0.25	16	0.25	0.5	128	0.25	355	S83L	0	0	D475E	0	0	0	0	0	0	0	0	0	0	0	0	0	0	0	0	0	0	0
34-2014-01-6625_GGACTCCT-TATCCTCT	S	2014	G	1	2	8	4	0.25	16	64	0.5	128	0.25	162	S83L	0	0	0	0	0	0	0	0	0	0	0	0	0	0	0	1	0	0	0	0	0	0
34-43-T-0_S41	T	2006	O	0	1	4	2	0.06	32	0.5	0.5	2	0.016	756	0	0	0	0	0	0	0	0	0	0	0	0	0	0	0	0	0	0	0	0	0	0	0
35-44-T-0_S42	T	2006	U	0	2	8	2	0.12	16	1	0.5	8	0.03	1251	0	0	0	0	0	0	0	0	0	0	0	0	0	0	0	0	0	0	0	0	0	0	0
36-45-T-0_S43	T	2006	S	0	2	8	4	0.06	16	0.5	1	2	0.03	191	0	0	0	0	0	0	0	0	0	0	0	0	0	0	0	0	0	0	0	0	0	0	0
37-46-T-0_S44	T	2006	V	0	1	4	64	0.06	4096	0.25	0.5	2	0.03	69	0	0	S57T	0	0	0	0	0	0	1	0	0	0	0	0	0	0	0	0	1	0	0	0
38-47-T-0_S45	T	2006	I	0	32	2	64	0.06	4096	64	0.5	4	0.03	48	0	0	0	0	1	0	0	0	0	0	1	0	0	1	0	0	0	0	1	0	0	1	0
39-48-T-0_S46	T	2014	N	0	64	8	128	0.25	8	0.25	1	4	0.015	1286	0	0	0	0	0	0	0	0	0	0	0	1	0	0	0	0	0	0	0	0	0	1	0
40-49-T-1_S47	T	2014	J	1	2	8	2	0.25	8	0.25	0.5	32	0.25	349	S83L	0	0	0	0	0	0	0	0	0	0	0	0	0	0	0	0	0	0	0	0	0	0
41-2014-01-7136_TAGGCATG-CTCTCTAT	S	2014	A	1	64	8	128	0.25	2048	64	1	256	8	162	S83L, D87N	0	S80I	0	1	0	0	0	0	0	1	0	0	1	0	0	0	0	0	0	1	1	0
41-50-T-0_S48	T	2014	R	0	2	8	1	0.25	8	0.25	0.5	4	0.015	10	0	0	0	0	0	0	0	0	0	0	0	0	0	0	0	0	0	0	0	0	0	0	0
42-51-T-0_S49	T	2014	O	0	2	8	4	0.25	8	0.25	0.5	4	0.015	5375	0	S463A	0	0	0	0	0	0	0	0	0	0	0	0	0	0	0	0	0	0	0	0	0
43-52-T-0_S50	T	2014	C	0	2	8	128	2	8	0.25	0.5	4	0.015	2040	0	0	0	0	0	0	0	0	1	0	0	0	0	0	0	0	0	0	0	0	0	0	0
44-53-T-0_S51	T	2014	Q	0	2	8	2	0.25	8	0.25	1	4	0.03	5825	0	0	0	0	0	0	0	0	0	0	0	0	0	0	0	0	0	0	0	0	0	0	0
45-54-T-0_S52	T	2014	Q	0	2	8	1	0.25	8	0.25	0.5	4	0.015	1594	0	0	0	0	0	0	0	0	0	0	0	0	0	0	0	0	0	0	0	0	0	0	0
46-2014-01-7512_TAGGCATG-CTAAGCCT	S	2014	U	1	2	8	128	0.25	16	0.25	2	32	0.25	355	S83L	0	0	D475E	0	0	0	0	1	0	0	0	0	0	0	0	0	0	0	0	0	0	0
46-55-T-0_S53	T	2014	P	0	2	8	4	0.25	8	0.25	0.5	4	0.015	115	0	0	0	0	0	0	0	0	0	0	0	0	0	0	0	0	0	0	0	0	0	0	0
4-6-S-1_S11	S	2014	B	1	2	8	4	0.25	16	0.5	1	128	0.25	131	S83L	0	0	0	0	0	0	0	0	0	0	0	0	0	0	0	0	0	0	0	0	0	0
47-56-T-0_S54	T	2014	N	0	2	8	2	0.25	8	0.25	0.5	4	0.015	5825	0	0	0	0	0	0	0	0	0	0	0	0	0	0	0	0	0	0	0	0	0	0	0
48-57-T-0_S55	T	2014	I	0	2	8	4	0.25	8	0.25	0.5	4	0.015	5825	0	0	0	0	0	0	0	0	0	0	0	0	0	0	0	0	0	0	0	0	0	0	0
49-58-T-0_S56	T	2014	L	0	2	8	4	0.25	8	0.25	0.5	4	0.015	189	0	0	0	0	0	0	0	0	0	0	0	0	0	0	0	0	0	0	0	0	0	0	0
50-59-T-0_S57	T	2014	T	0	2	8	2	0.25	8	0.25	1	4	0.015	1056	0	0	0	0	0	0	0	0	0	0	0	0	0	0	0	0	0	0	0	0	0	0	0
51-60-T-0_S58	T	2014	O	0	2	8	4	0.25	8	0.25	1	4	0.015	2178	0	0	0	0	0	0	0	0	0	0	0	0	0	0	0	0	0	0	0	0	0	0	0
52-61-T-0_S59	T	2014	K	0	2	8	2	0.25	32	0.25	1	4	0.015	5825	0	0	0	0	0	0	0	0	0	0	0	0	0	0	0	0	0	0	0	0	0	0	0
53-62-T-0_S60	T	2014	H	0	2	8	4	0.25	16	0.5	1	4	0.015	5825	0	0	0	0	0	0	0	0	0	0	0	0	0	0	0	0	0	0	0	0	0	0	0
54-63-T-0_S61	T	2014	D	0	2	8	2	0.25	16	0.25	1	4	0.015	5375	0	S463A	0	0	0	0	0	0	0	0	0	0	0	0	0	0	0	0	0	0	0	0	0
55-64-T-0_S62	T	2014	F	0	2	8	4	0.25	16	0.25	1	4	0.015	9427	0	0	0	0	0	0	0	0	0	0	0	0	0	0	0	0	0	0	0	0	0	0	0
56-65-T-0_S63	T	2014	C	0	2	8	128	0.25	16	0.25	1	4	0.015	9424	0	0	0	0	0	0	0	0	0	0	1	0	0	0	0	0	0	0	0	0	0	0	0
57-66-T-0_S64	T	2014	B	0	2	8	2	0.25	8	0.25	0.5	4	0.015	10	0	0	0	0	0	0	0	0	0	0	0	0	0	0	0	0	0	0	0	0	0	0	0
5-7-S-1_S12	S	2014	Q	1	2	8	4	0.25	16	0.25	0.5	128	0.25	131	S83L	0	0	0	0	0	0	0	0	0	0	0	0	0	0	0	0	0	0	0	0	0	0
58-67-T-0_S65	T	2014	E	0	2	8	4	0.25	8	0.25	1	4	0.015	5825	0	0	0	0	0	0	0	0	0	0	0	0	0	0	0	0	0	0	0	0	0	0	0
59-68-T-0_S66	T	2014	G	0	2	8	2	0.25	32	0.25	2	4	0.015	10	0	0	0	0	0	0	0	0	0	0	0	0	0	0	0	0	0	0	0	0	0	0	0
60-69-T-0_S67	T	2014	M	0	2	8	2	0.25	16	0.5	0.5	4	0.015	10	0	0	0	0	0	0	0	0	0	0	0	0	0	0	0	0	0	0	0	0	0	0	0
61-70-T-0_S68	T	2014	K	0	2	8	4	0.25	8	0.25	1	4	0.015	5825	0	0	0	0	0	0	0	0	0	0	0	0	0	0	0	0	0	0	0	0	0	0	0
62-71-T-0_S69	T	2014	T	0	2	8	2	0.25	8	0.25	0.5	4	0.015	10	0	0	0	0	0	0	0	0	0	0	0	0	0	0	0	0	0	0	0	0	0	0	0
63-72-T-0_S70	T	2014	D	0	2	8	2	0.25	8	0.25	1	4	0.015	10	0	0	0	0	1	0	0	0	0	0	0	0	0	0	0	0	0	0	0	0	0	0	0
64-73-T-0_S71	T	2014	O	0	2	8	8	0.25	8	0.25	1	4	0.015	1266	0	0	0	0	0	0	0	0	0	0	0	0	0	0	0	0	0	0	0	0	0	0	0
65-2014-01-7394_S9	S	2014	V	1	128	256	128	0.25	2048	64	1	256	8	162	S83L, D87N	0	S80I	0	0	1	1	1	0	0	1	0	1	0	0	1	0	0	0	1	0	0	1
65-74-T-0_S72	T	2014	A	0	2	8	2	0.25	8	0.25	1	4	0.015	442	0	0	0	0	0	0	0	0	0	0	0	0	0	0	0	0	1	0	0	0	0	0	0
66-75-T-0_S73	T	2014	P	0	2	8	4	0.25	8	0.25	1	4	0.015	3107	0	0	0	0	0	0	0	0	0	0	0	0	0	0	0	0	0	0	0	0	0	0	0
67-76-T-0_S74	T	2014	S	0	2	8	128	0.25	16	0.25	1	4	0.015	10	0	0	0	0	0	0	0	0	0	0	1	0	0	0	0	0	0	0	0	0	0	0	0
68-77-T-0_S75	T	2014	V	0	2	8	2	0.25	8	0.25	1	4	0.015	10	0	0	0	0	0	0	0	0	0	0	0	0	0	0	0	0	0	0	0	0	0	0	0
6-8-S-1_S13	S	2014	Q	1	2	8	4	0.25	16	0.25	0.5	128	0.25	355	S83L	0	0	D475E	0	0	0	0	0	0	0	0	0	0	0	0	0	0	0	0	0	0	0
69-78-T-0_S76	T	2014	U	0	2	8	2	0.25	8	0.25	0.5	4	0.015	752	0	0	0	0	0	0	1	1	0	0	0	0	0	0	0	0	0	0	0	0	0	0	0
70-79-T-0_S77	T	2014	R	0	2	8	4	0.25	16	0.25	1	4	0.015	10	0	0	0	0	0	0	0	0	0	0	0	0	0	0	0	0	0	0	0	0	0	0	0
71-80-T-0_S78	T	2014	U	0	2	8	1	0.25	16	0.25	0.5	4	0.015	10	0	0	0	0	0	0	0	0	0	0	0	0	0	0	0	0	0	0	0	0	0	0	0
72-81-T-0_S79	T	2014	V	0	128	8	4	0.25	8	0.25	0.5	4	0.015	602	0	0	0	0	0	0	1	1	0	0	0	0	0	0	0	0	0	1	0	0	0	0	1
73-82-T-0_S80	T	2016	R	0	2	8	2	0.25	8	0.25	0.5	4	0.015	5825	0	0	0	0	0	0	0	0	0	0	0	0	0	0	0	0	0	0	0	0	0	0	0
74-83-T-0_S81	T	2016	G	0	2	8	2	0.25	8	0.25	0.5	4	0.015	10	0	0	0	0	0	0	0	0	0	0	0	0	0	0	0	0	0	0	0	0	0	0	0
75-84-T-0_S82	T	2016	M	0	2	8	2	0.25	2048	0.25	0.5	4	0.015	10	0	0	0	0	0	0	0	0	0	0	0	0	0	0	0	0	0	0	0	1	0	0	0
76-85-T-0_S83	T	2016	F	0	2	8	4	0.25	8	0.25	0.5	4	0.015	328	0	0	0	0	0	0	0	0	0	0	0	0	0	0	0	0	0	0	0	0	0	0	0
77-86-T-0_S84	T	2016	M	0	2	8	2	0.25	8	0.25	0.5	4	0.015	10	0	0	0	0	0	0	0	0	0	0	0	0	0	0	0	0	0	0	0	0	0	0	0
78-87-T-1_S85	T	2016	K	1	2	8	4	0.25	8	0.25	1	256	1	752	S83L	0	S80I	0	0	0	1	1	0	0	0	0	0	0	0	0	0	0	0	0	0	0	0
79-88-T-0_S86	T	2016	I	0	4	8	4	0.25	2048	0.25	1	4	0.015	1730	0	0	0	0	0	0	0	0	0	0	0	0	0	0	0	0	0	0	0	0	0	0	0
7-9-S-1_S14	S	2014	P	1	2	8	4	0.25	8	0.25	0.5	128	0.25	355	S83L	0	0	D475E	0	0	0	0	0	0	0	0	0	0	0	0	0	0	0	0	0	0	0
80-89-T-0_S87	T	2016	G	0	2	8	2	0.25	1024	0.25	0.5	4	0.015	10	0	0	0	0	0	0	0	0	0	0	0	0	0	0	0	0	0	0	0	0	0	0	0
8-10-S-1_S15	S	2014	N	1	2	8	4	0.25	16	0.25	0.5	128	0.25	131	S83L	0	0	0	0	0	0	0	0	0	0	0	0	0	0	0	0	0	0	0	0	0	0
81-91-T-0_S88	T	2016	F	0	2	8	4	0.25	8	0.25	0.5	4	0.015	5825	0	0	0	0	0	0	0	0	0	0	0	0	0	0	0	0	0	0	0	0	0	0	0
8-2014-01-2071_TAAGGCGA-TCTCTCCG	S	2014	O	1	64	8	128	0.25	8	0.25	0.5	128	0.12	10	S83L	0	0	0	0	0	0	0	0	0	1	0	0	0	0	0	0	0	0	0	0	1	0
82-92-T-0_S89	T	2016	J	0	32	8	2	0.25	8	0.25	0.5	4	0.015	648	0	0	0	0	0	0	0	0	0	0	0	0	0	0	0	0	0	0	0	0	0	1	0
83-93-T-0_S90	T	2016	J	0	2	8	4	0.25	8	0.25	0.5	4	0.03	1266	0	0	0	0	0	0	0	0	0	0	0	0	0	0	0	0	0	0	0	0	0	0	0
84-95-T-0_S91	T	2016	K	0	2	8	2	0.25	8	0.25	0.5	4	0.015	10	0	0	0	0	0	0	0	0	0	0	0	0	0	0	0	0	0	0	0	0	0	0	0
85-96-T-0_S92	T	2016	A	0	2	8	4	0.25	8	0.25	0.5	4	0.015	5825	0	0	0	0	0	0	0	0	0	0	0	0	0	0	0	0	0	0	0	0	0	0	0
86-97-T-0_S93	T	2016	A	0	2	8	2	0.25	8	0.25	0.5	4	0.015	10	0	0	0	0	0	0	0	0	0	0	0	0	0	0	0	0	0	0	0	0	0	0	0
87-98-T-0_S94	T	2016	M	0	2	8	4	0.25	8	0.25	1	4	0.015	1266	0	0	0	0	0	0	0	0	0	0	0	0	0	0	0	0	0	0	0	0	0	0	0
88-99-T-0_S95	T	2016	I	0	2	8	8	0.25	8	0.25	0.5	4	0.015	189	0	0	0	0	0	0	0	0	0	0	0	0	0	0	0	0	0	0	0	0	0	0	0
89-100-T-0_S96	T	2016	H	0	2	8	4	0.25	8	0.25	0.5	4	0.015	10	0	0	0	0	0	0	0	0	0	0	0	0	0	0	0	0	0	0	0	0	0	0	0
90-101-T-0_S97	T	2016	S	0	2	8	4	0.25	8	0.25	2	4	0.015	10	0	0	0	0	0	0	0	0	0	0	0	0	0	0	0	0	0	0	0	0	0	0	0
91-102-T-0_S98	T	2016	B	0	2	8	2	0.25	8	0.25	0.5	4	0.015	1286	0	0	0	0	0	0	0	0	0	0	0	0	0	0	0	0	0	0	0	0	0	0	0
9-11-S-1_S16	S	2014	I	1	2	8	4	0.25	8	0.25	0.5	128	0.25	355	S83L	0	0	D475E	0	0	0	0	0	0	0	0	0	0	0	0	0	0	0	0	0	0	0
92-103-T-0_S99	T	2016	E	0	2	8	2	0.25	8	0.25	0.5	4	0.015	10	0	0	0	0	0	0	0	0	0	0	0	0	0	0	0	0	0	0	0	0	0	0	0
93-104-T-0_S100	T	2017	L	0	2	8	2	0.25	8	0.25	1	4	0.015	9425	0	0	0	0	0	0	0	0	0	0	0	0	0	0	0	0	0	0	0	0	0	0	0
94-105-T-0_S101	T	2017	L	0	2	8	2	0.25	8	0.25	1	4	0.015	117	0	0	0	0	0	0	0	0	0	0	0	0	0	0	0	0	0	0	0	0	0	0	0
95-106-T-0_S102	T	2017	L	0	2	8	2	0.25	8	0.25	0.5	4	0.015	9426	0	0	0	0	0	0	0	0	0	0	0	0	0	0	0	0	0	0	0	0	0	0	0
